# Supplementary material
Source: PubMed Central journal article supplement (PMC6351216)
Supplement: NIHMS994347-supplement-Supp_info1.pdf [file NIHMS994347-supplement-Supp_info1.pdf]

## Supplementary Information

### **TgDrpC, an atypical dynamin-related protein in *Toxoplasma gondii*, is associated with vesicular transport factors and parasite division**

**Running Title:** Characterization of TgDrpC

Irene Heredero-Bermejo<sup>1</sup>, Joseph M. Varberg<sup>1</sup>, Robert Charvat<sup>1</sup>, Kylie Jacobs<sup>2</sup>, Tamila Garbuz<sup>1</sup>, William J. Sullivan, Jr.<sup>1,2\*</sup>, and Gustavo Arrizabalaga<sup>1,2\*</sup>

<sup>1</sup> Department of Pharmacology and Toxicology, Indiana University School of Medicine, Indianapolis, IN 46202

<sup>2</sup> Department of Microbiology and Immunology, Indiana University School of Medicine, Indianapolis, IN 46202

\* Joint senior authorship: WJS and GA should be considered joint senior author.

**Corresponding author:** Gustavo Arrizabalaga. [garrizab@iu.edu](mailto:garrizab@iu.edu). Tel. +1 317-278-6355

**Keywords:** *Toxoplasma gondii*, dynamin-related protein, DrpC, parasite, endodyogeny, Inner membrane complex.

**Figure S1. DrpC protein expression levels in presence and absence of Shld1.** A) Immunoblot staining for TgDrpC-HA-DD protein in the presence and absence of 200 nM Shld1 at 36, 42 and 48 hours. Anti-SAG1 antibody used as loading control. B) Protein quantitation by densitometry analysis of three biological replicates of TgDrpC-HA-DD parasites growth with or without Shld1 (n=3). Densitometry values were normalized to SAG1 and the ratio DrpC –Shld1/DrpC +Shld1 was calculated.

**Figure S2. Immunoblot of interactor tagged strains.** A) Immunoblot of parasite extract of strains expressing TgDrpC-HA, or both TgDrpC-HA and TGGT1\_272600-myc, was probed with anti-myc antibodies. B) Immunoblot of parasite extract of strains expressing TgDrpC-HA, or both TgDrpC-HA and TGGT1\_262150-myc, was probed with anti-myc antibodies.

**Table S1. Data with number of peptides detected for all experimental (HA 1, HA 2, HA 3) and control (IgG 1, IgG 2, IgG3) immunoprecipitations from DrpC-HA expressing parasites.** Also included are the number of peptides detected in immunoprecipitation from non-HA expressing control parasites using HA conjugated beads (Parental HA) or IgG control (Parental IgG). Column A shows the ID for the proteins detected, column B has the annotation based on ToxoDB.

**Table S2. List of primers used in this study.** *T. gondii* genomic sequence are shown in capital letters. Restriction enzymes are shown in italics.

Figure S1

**A**

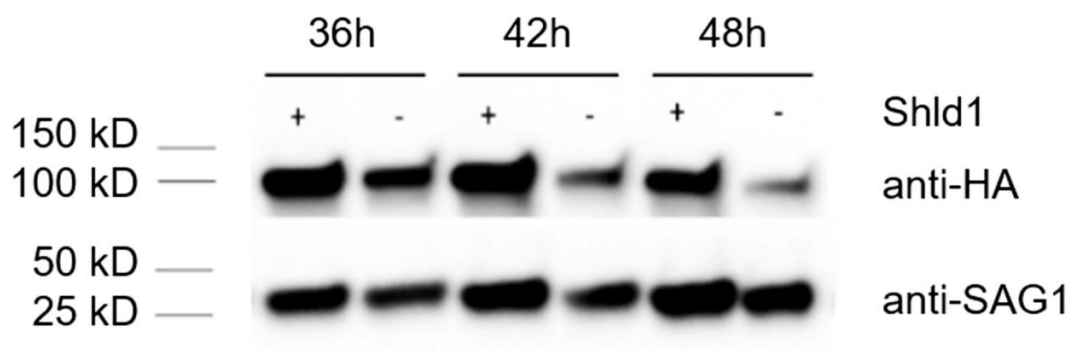

**B**

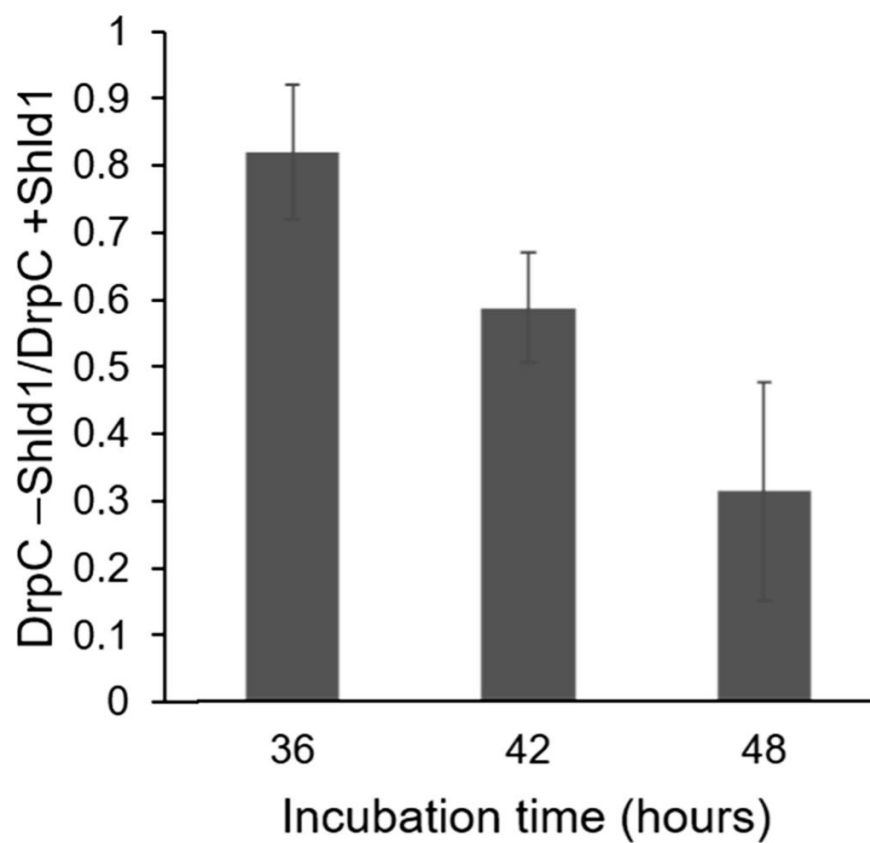

Figure S2

A

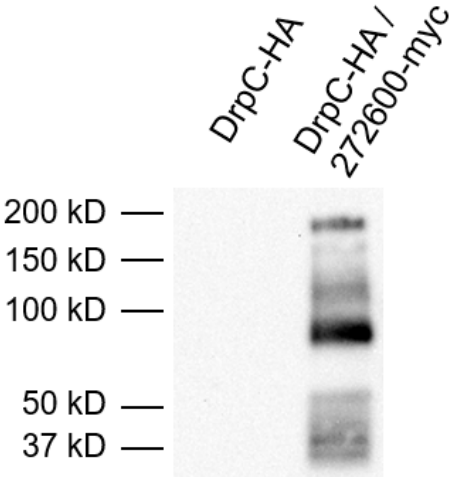

B

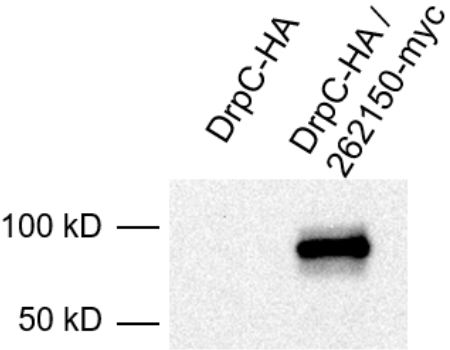

**Table S1**

| Accession Number |                                                                                 | SAINT Score (SP) | T-Test (p-value): (p < 0.05) | HA 1 Total Peptides | HA 2 Total Peptides | HA 3 Total Peptides | Total Peptides in Experimental IP | IgG1 Total Peptides | IgG2 Total Peptides | IgG3 Total Peptides | Parental HA IP Total Peptides | Parental IgG Total Peptides | Total Peptides in control IP |
|------------------|---------------------------------------------------------------------------------|------------------|------------------------------|---------------------|---------------------|---------------------|-----------------------------------|---------------------|---------------------|---------------------|-------------------------------|-----------------------------|------------------------------|
| TGGT1_270690     | DrpC                                                                            | 1                | 0,00024                      | 146                 | 191                 | 195                 | 532                               | 0                   | 1                   | 2                   | 0                             | 0                           | 3                            |
| TGGT1_294560     | rhoptry kinase family protein ROP37 (incomplete catalytic triad)                | 1                | 0,0064                       | 37                  | 25                  | 39                  | 101                               | 0                   | 0                   | 0                   | 0                             | 0                           | 0                            |
| TGGT1_262150     | kelch repeat and K+ channel tetramerisation domain containing protein           | 1                | 0,0031                       | 19                  | 31                  | 24                  | 74                                | 0                   | 0                   | 0                   | 0                             | 0                           | 0                            |
| TGGT1_227800     | EF hand domain-containing protein                                               | 1                | 0,0008                       | 19                  | 25                  | 23                  | 67                                | 0                   | 0                   | 0                   | 0                             | 0                           | 0                            |
| TGGT1_227850     | peptidyl-prolyl cis-trans isomerase, cyclophilin-type domain-containing protein | 1                | 0,086                        | 24                  | 8                   | 13                  | 45                                | 0                   | 0                   | 0                   | 0                             | 0                           | 0                            |
| TGGT1_272600     | adaptin c-terminal domain-containing protein                                    | 1                | 0,013                        | 5                   | 15                  | 17                  | 37                                | 0                   | 0                   | 0                   | 0                             | 0                           | 0                            |
| TGGT1_305940     | peptidyl-prolyl cis-trans isomerase, cyclophilin-type domain-containing protein | 1                | 0,0047                       | 13                  | 10                  | 13                  | 36                                | 0                   | 0                   | 0                   | 0                             | 0                           | 0                            |
| TGGT1_226240     | putative bud site selection protein                                             | 1                | 0,001                        | 10                  | 11                  | 11                  | 32                                | 0                   | 0                   | 0                   | 0                             | 0                           | 0                            |
| TGGT1_257070     | hypothetical protein                                                            | 1                | 0,0053                       | 4                   | 7                   | 5                   | 16                                | 0                   | 0                   | 0                   | 0                             | 0                           | 0                            |
| TGGT1_239330     | ribosomal protein RPL37                                                         | 1                | 0,00039                      | 4                   | 5                   | 5                   | 14                                | 0                   | 0                   | 0                   | 0                             | 0                           | 0                            |
| TGGT1_312960     | hypothetical protein                                                            | 1                | 0,0095                       | 3                   | 6                   | 4                   | 13                                | 0                   | 0                   | 0                   | 0                             | 0                           | 0                            |
| TGGT1_261450     | hypothetical protein                                                            | 1                | 0,022                        | 5                   | 4                   | 3                   | 12                                | 0                   | 0                   | 0                   | 0                             | 0                           | 0                            |
| TGGT1_308890     | transcription elongation factor SPT6                                            | 0,97             | 0,017                        | 2                   | 2                   | 6                   | 10                                | 0                   | 0                   | 0                   | 0                             | 0                           | 0                            |
| TGGT1_216435     | hypothetical protein                                                            | 0,98             | 0,032                        | 4                   | 2                   | 3                   | 9                                 | 0                   | 0                   | 0                   | 0                             | 0                           | 0                            |
| TGGT1_221940     | adaptin n terminal region domain-containing protein                             | 0,7              | 0,023                        | 2                   | 3                   | 5                   | 10                                | 0                   | 0                   | 0                   | 0                             | 0                           | 0                            |
| TGGT1_313450     | putative AP-2 complex subunit sigma-1                                           | 0,97             | < 0,00010                    | 2                   | 2                   | 3                   | 7                                 | 0                   | 0                   | 0                   | 0                             | 0                           | 0                            |

**Table S2**

| Set | Name                         | Sequence                                           |
|-----|------------------------------|----------------------------------------------------|
| A   | DrpC_ <i>EcoRV</i> .F        | 5'- TTCCAATCCAATTTAATTAATGTCTGGCGCGGAGAAAC -3'     |
| A   | DrpC_ <i>EcoRV</i> .R        | 5'- CCACTTCCAATTTTAATTAAGCCCCATTCAACGGTGAC -3'     |
| B   | TGGT1_262150. <i>NcoI</i> .F | 5'- ttcaatccaatttaattaaTCTTTTTCCTTTTCCTGCTCTGG -3' |
| B   | TGGT1_262150. <i>NcoI</i> .R | 5'- ccactccaattttaattaaCAAATTTGCCAAGAGAATGCCG -3'  |
| C   | TGGT1_272600. <i>NcoI</i> .F | 5'- ttcaatccaatttaattaaCAACTGCCGGGCAGTCA -3'       |
| C   | TGGT1_272600. <i>NcoI</i> .R | 5'- ccactccaattttaattaaGCTCGAAGAGAGCGGC -3'        |
